# Supplementary material
Source: HighWire-hosted journal article supplement (doi:10.1101/rna.079833.123)

# Turn-on RNA Mango Beacons for Trans-Acting Fluorogenic Nucleic Acid Detection

Amir Abdolazadeh<sup>1</sup>, Quiana R. Ang<sup>1</sup>, Jana R. Caine<sup>2</sup>, Shanker Shyam S. Panchapakesan<sup>3</sup>,  
Shinta Thio<sup>1</sup>, Razvan Cojocaru<sup>1</sup>, and Peter J. Unrau<sup>1\*</sup>

<sup>1</sup>Department of Molecular Biology and Biochemistry, Simon Fraser University, Burnaby, British Columbia, Canada V5A 1S6

<sup>2</sup>Department of Chemistry, The University of British Columbia, Vancouver, British Columbia, Canada, V6T 1Z1

<sup>3</sup>School of Chemical and Biotechnology, SASTRA University, Thanjavur, Tamilnadu, India, 613401

\*To whom correspondence should be addressed:

Phone 778-782-3448; punrau@sfu.ca

**Running title: RNA Mango Beacons**

Keywords: G-quadruplex folding regulation, RNA Mango aptamer, fluorescent reporter, molecular beacon, nucleic acid reporting

## Supplementary Tables

**Table S1.** DNA suppressor sequences for **Figure S1** with contrast and relative  $F_{\max}$ .

| Identity                 | Sequence                                                                                     | Contrast     | $F_{\max}$ |
|--------------------------|----------------------------------------------------------------------------------------------|--------------|------------|
| Extended Beacon Reporter | GGA UCA CAU ACG GAC AAU<br>AGC AGG AGA GGA GAG GAA<br>GAG GAG AAC GUA GCC UGG<br>CUA AUG CCC | n/a          | n/a        |
| Complementary Trigger    | GGG CAU UAG CCA GGC UAC<br>GUG CUA UUG UCC GUA UGU<br>GAU CC                                 | 10           | 98         |
| D6                       | CTC TCC TGC TAT                                                                              | $113 \pm 4$  | $89 \pm 3$ |
| DNA A                    | CTC TCC TGC TAT TGT CCG                                                                      | $126 \pm 2$  | $79 \pm 2$ |
| DNA B                    | AGG CTA CGT TCT CCT CTT                                                                      | $62 \pm 1$   | $72 \pm 1$ |
| DNA C                    | CCT CTC CTG CTA TTG TCC G                                                                    | $176 \pm 10$ | $64 \pm 4$ |
| DNA D                    | CCT CTC CTG CTA TTG TCC                                                                      | $38 \pm 1$   | $79 \pm 3$ |
| DNA E                    | CCT GCT ATT GTC CGT ATG                                                                      | $142 \pm 10$ | $51 \pm 4$ |

Sequences start with 5' end.

## Supplementary Figure Legends

**Figure S1. The effect of DNA suppressor length and position on contrast and fluorescence maxima.** Relative fluorescence maximum and contrast reported, standard deviation shown (error bars). Sequences available in **Table S1**. Sample X is the indicated beacon sequence in the absence of any DNA oligonucleotide.

**Figure S2. Initial screening for adapter nucleotides flanking Mango cores and trigger gaps.** Six Mango I type Beacons (top to bottom) with various flanking nucleotides were tested with triggers containing either 0, 1, or 2 nucleotides of separation between hybridization sites (left to right). 5' and 3' flanking adenosines on the Mango core with a trigger containing 0 nucleotides of separation gave the highest contrast, and were therefore used in the future construct designs. Experiments were performed in singlet as an initial screen on a SpectramaxM5 Plate Reader. Final fluorescence values are given in RFU and contrast (C) calculated as described in the main text.

**Figure S3. Mango Beacons are sensitive to single point mutations (SPMs).** SPMs are colored in red (**Table 3**, bolded) while wildtype sequences are in green and black. D: addition of TO1-Biotin (100 nM final), S: Addition of Mango Beacon (50 nM final), T: Addition of Trigger (100 nM final).

**Figure S4. Kinetics of Mango Beacon folding for on-rate determination.** Kinetics of linear fluorescence emergence upon target RNA addition for: **A)** A self-hybridizing Mango Beacon (MIIB + 4i) or **B)** A DNA oligo inhibited reporter (MIIB and D5). **C)** Calculated molar rate

(M/s) vs. trigger concentration (nM) was used to estimate on-rates. RNA beacon was held at 50 nM throughout.

**Figure S5. Mango Beacons of MIIB + 4i type can misfold. A)** The dominant band induced by Trigger A (<sup>32</sup>P label: left panel) displays Mango TO1-B fluorescence (TO1-B stained gel, right panel), whereas Trigger B and a DNA trigger induce minimal in-gel fluorescence. **B)** Self-inhibiting Mango Beacons can misfold creating multiple bands as visualized by native gel analysis. Three trigger strands (A, B and C) were added to <sup>32</sup>P radiolabeled MIIB + 4i and analyzed in a native gel.

**Figure S6. DMS probing of Mango II and a MIIB + 5i. A)** Mango II aptamer sequence (left) with stem (gray and dark gray) and a GAA<sup>^</sup>A tetraloop (violet). **B)** MIIB + 5i shown hybridized to its trigger strand with colored hybridization arms (light hybridized to dark shades respectively), adapter A residues (violet) flanking the quadruplex core, and self-inhibitory sequence is shown in orange. Guanines participating in the G-quadruplex are bolded. Regions of quadruplex indicated by solid black bars. \* indicates location of <sup>32</sup>P radiolabel used in DMS probing. T1: T1 RNase ladder, OH: alkaline hydrolysis ladder.

Figure S1.

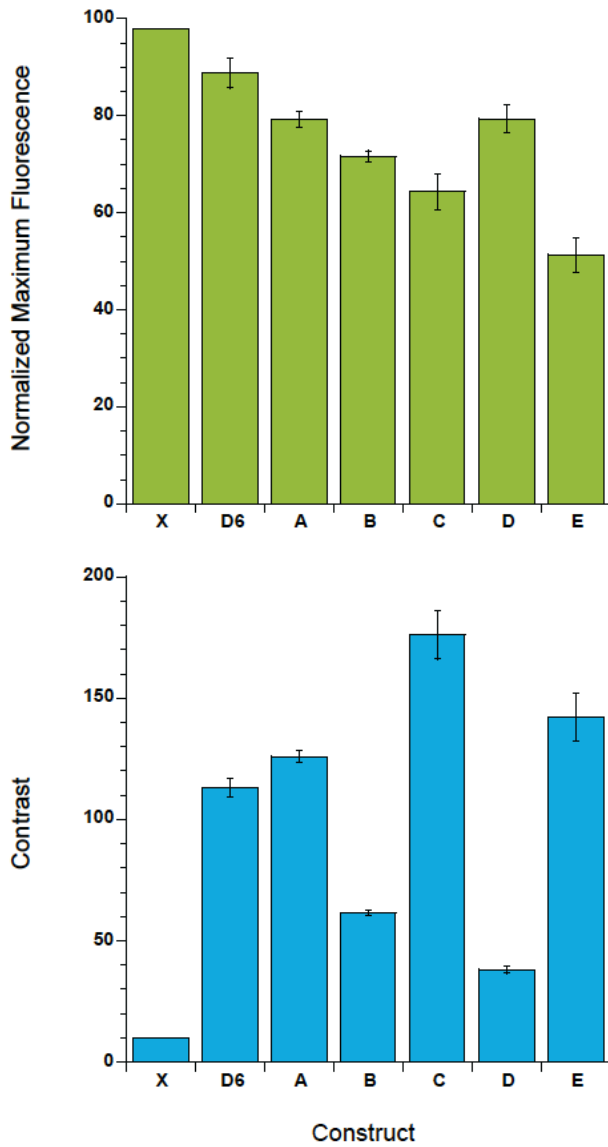

5' GGAUCACAUAACGGACAAUAGCAGGAGAGGAGAGGAAGAGGAGAACGUAGCCUGGCUAAUGCCC

Suppressor 6 TATCGTCCTCTC' 5

DNA A GCCTGTTATCGTCCTCTC' 5

DNA B TTCTCCTCTTGCATCGGA' 5

DNA C GCCTGTTATCGTCCTCTCC' 5

DNA D CCTGTTATCGTCCTCTCC' 5

DNA E GTATGCCTGTTATCGTCC' 5

Figure S2.

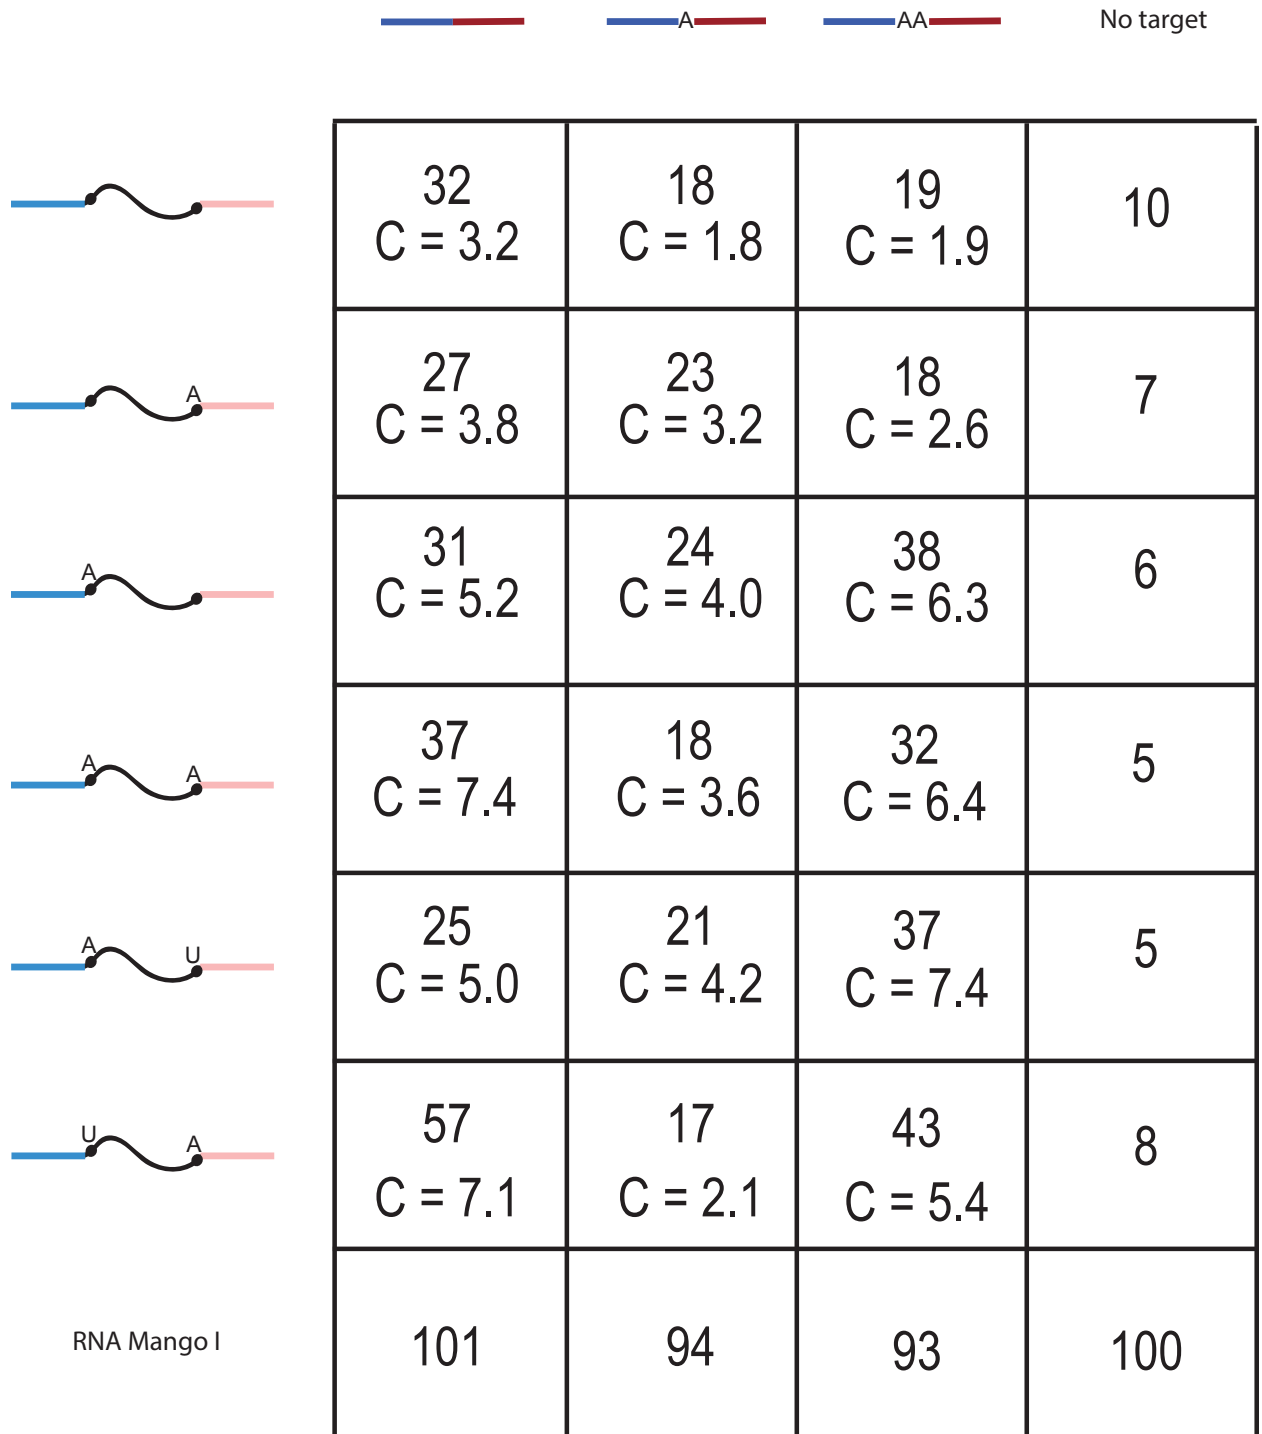

**Figure S3.**

**Wild Type Mango Beacon**

```

5' GGACAAUAGC A GGAG A GGAG A GGAAGA GGAG A ACGUAGCCUG CUCC GCUAA
3' CCUGUUAUCG ----- UGCAUCGGAC --- CGAUUGGG

C20A
5' GGACAAUAGC A GGAG A GGAG A GGAAGA GGAG A ACGUAGCCUG CUCC GCUAA
3' CCUGUUAUAG ----- UGCAUCGGAC --- CGAUUGGG

C20U
5' GGACAAUAGC A GGAG A GGAG A GGAAGA GGAG A ACGUAGCCUG CUCC GCUAA
3' CCUGUUAUUG ----- UGCAUCGGAC --- CGAUUGGG

U21G
5' GGACAAUAGC A GGAG A GGAG A GGAAGA GGAG A ACGUAGCCUG CUCC GCUAA
3' CCUGUUAAGCG ----- UGCAUCGGAC --- CGAUUGGG

U23G
5' GGACAAUAGC A GGAG A GGAG A GGAAGA GGAG A ACGUAGCCUG CUCC GCUAA
3' CCUGUGAUCG ----- UGCAUCGGAC --- CGAUUGGG
    
```

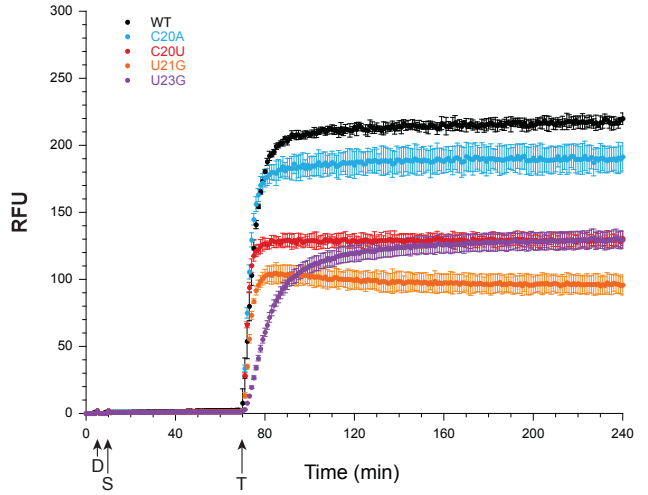

Figure S4.

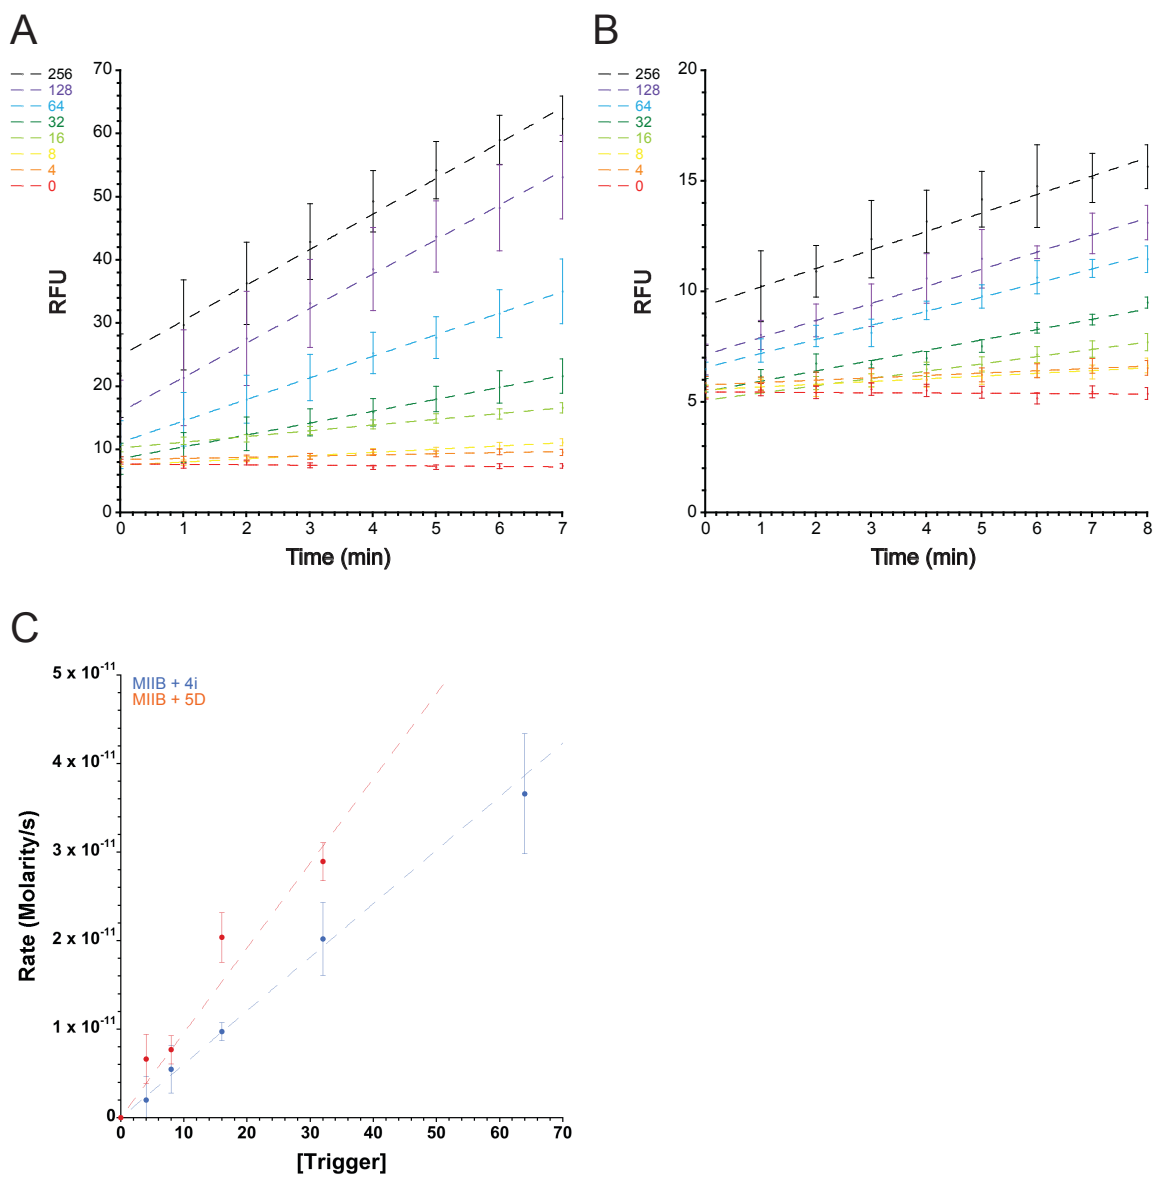

**Figure S5.**

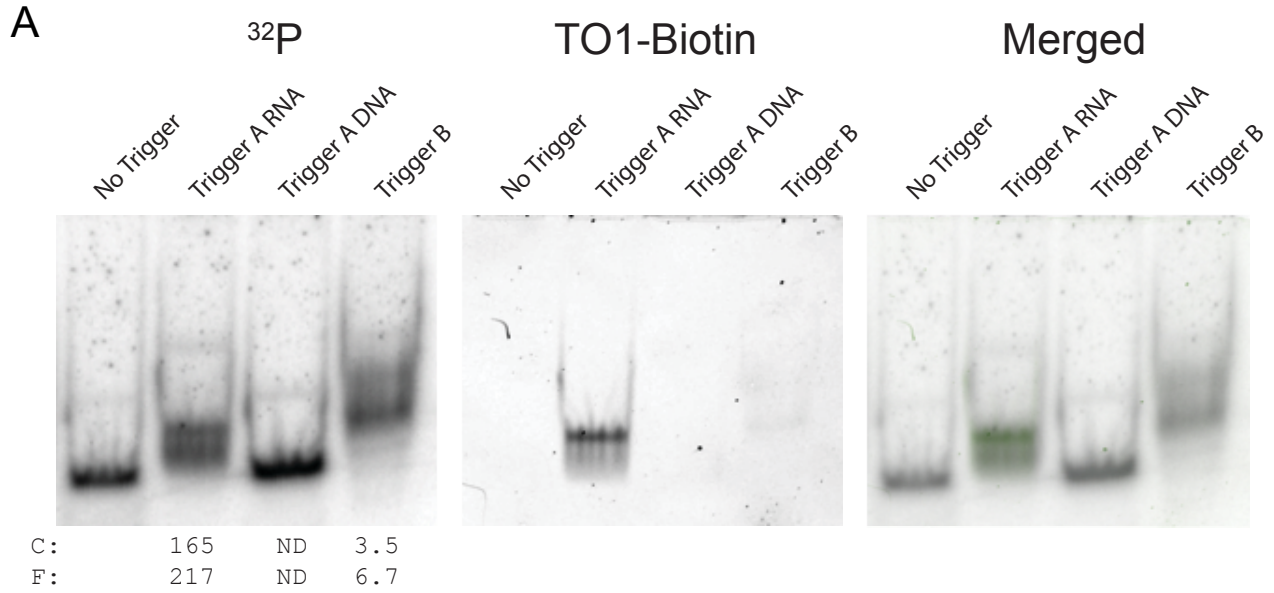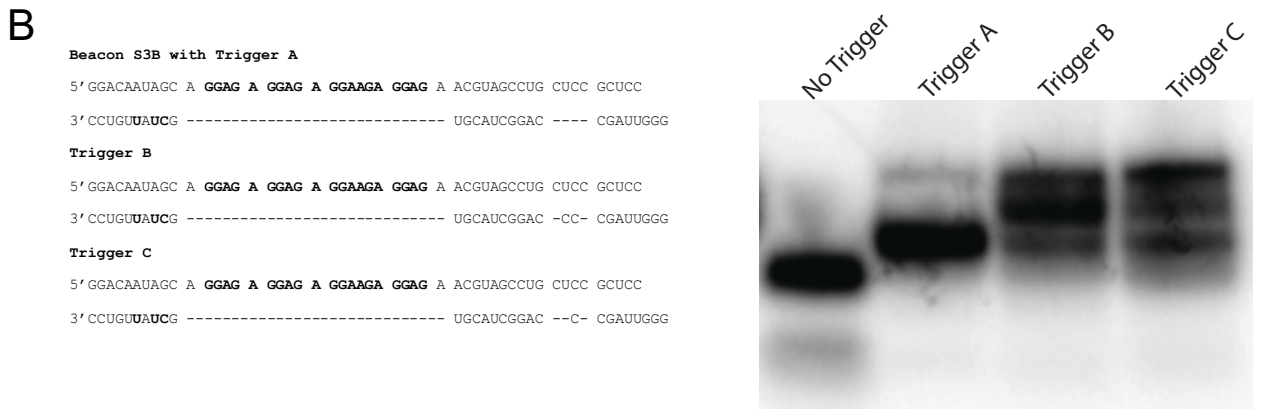

Figure S6.

A

Mango II

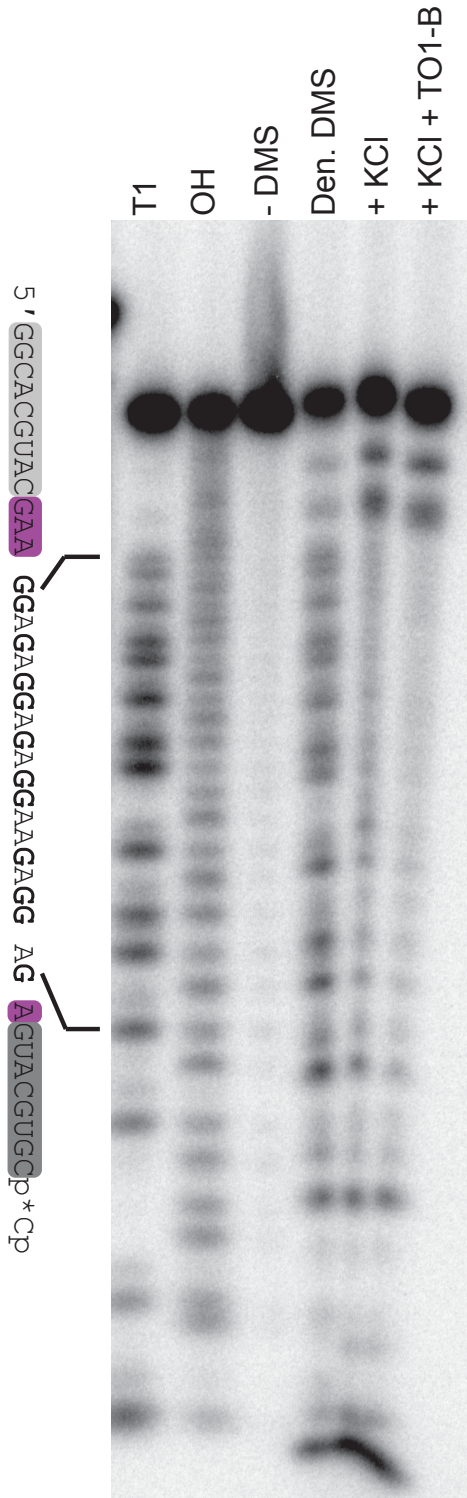

B

Mango Beacon (MIIB + 5i)

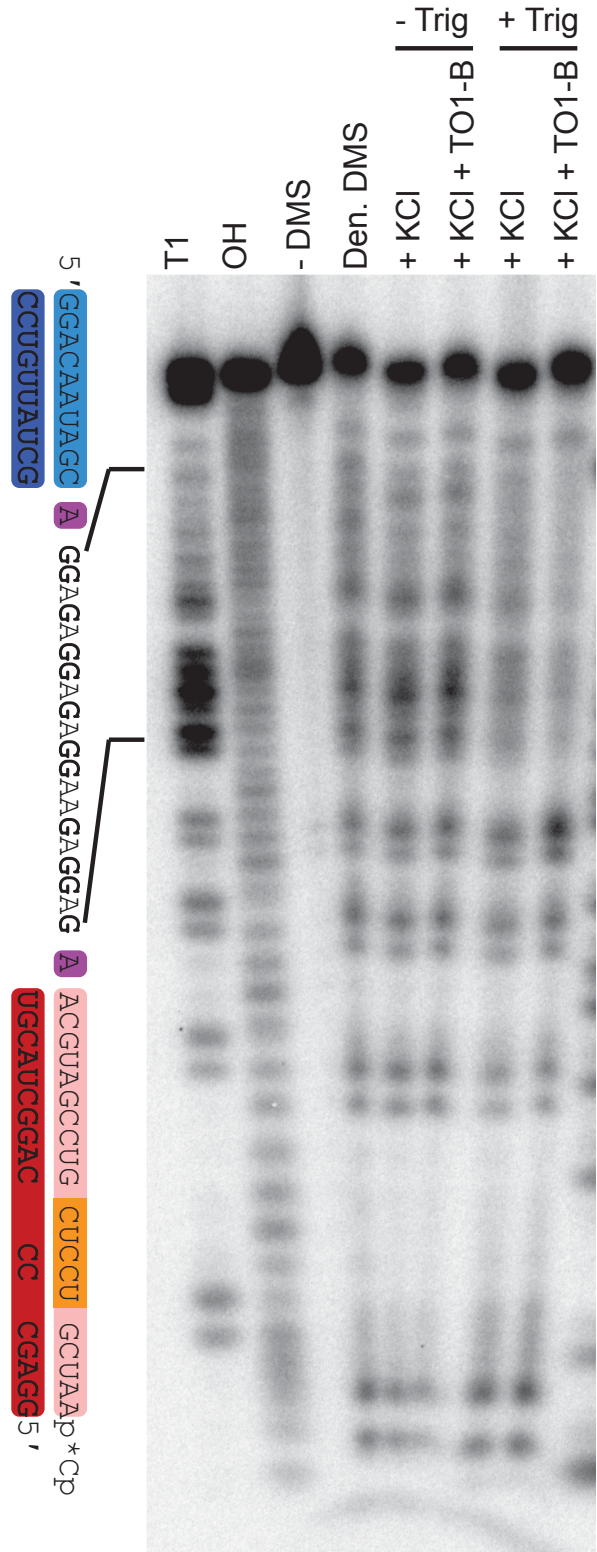

Supplement: Supplemental_Material.pdf [file Supplemental_Material.pdf]
